# Supplementary material for: Assessing Micturition, Sexual Function, and Endoscopic Outcomes One Year After Aquablation: A single center prospective study
Source: Research Square preprint supplement (doi:10.21203/rs.3.rs-3962066/v1), 2024-02-23
Supplement: Supplementary file 1 [file 47adebfbd2ade92ca41a7a9f.pdf]

| <b>Cystoscopy Results (N=106)</b>                           |                       |                  |
|-------------------------------------------------------------|-----------------------|------------------|
| Patency of prostatic Urethra (Likert Scale), n (%)          | <b>Perfect</b>        | <b>40 (37.7)</b> |
|                                                             | Good                  | 36 (33.9)        |
|                                                             | Discrete              | 20 (18.8)        |
|                                                             | Sufficient            | 6 (5.6)          |
|                                                             | Poor                  | 4 (3.7)          |
| Preservation of Verumontanum, n (%)                         | <b>100% Preserved</b> | <b>77 (72.6)</b> |
|                                                             | 75% Preserved         | 22 (20.7)        |
|                                                             | 50% Preserved         | 4 (3.7)          |
|                                                             | <50% Preserved        | 3 (2.8)          |
| Residual Median Lobe, n (%)                                 | 12 (11.3)             |                  |
| Fluffy tissue, n (%)                                        | Abundant              | 10 (9.4)         |
|                                                             | Moderate              | 9 (8.4)          |
|                                                             | Few                   | 9 (8.4)          |
|                                                             | <b>Absence</b>        | <b>80 (75.4)</b> |
| Mucosal flaps presence, n (%)                               | 16 (15.0)             |                  |
| Ureteral meatuses injury, n (%)                             | 0 (0)                 |                  |
| Trigone appearance, n (%)                                   | <b>Normal</b>         | <b>86 (81.1)</b> |
|                                                             | Erythematous          | 20 (18.8)        |
|                                                             | Sclerotic             | 0 (0)            |
| Length of the cavity formed (mm), mean (SD)                 | 24 (8.2)              |                  |
| Distance between the apex and the sphincter (mm), mean (SD) | 9.6 (5.3)             |                  |

Table 2 - morphological data of 106 patients underwent urethro-cystoscopy three months after surgery.
