# Supplementary material for: Assessing Micturition, Sexual Function, and Endoscopic Outcomes One Year After Aquablation: A single center prospective study
Source: Research Square preprint supplement (doi:10.21203/rs.3.rs-3962066/v1), 2024-02-23
Supplement: Supplementary file 2 [file 803a401bfcaa0779ab974e0b.pdf]

| <b>Complication Type</b>                                               | <b>Number of cases (%)</b> | <b>Clavien Grade</b> | <b>Onset</b>                          | <b>Management</b>                                                |
|------------------------------------------------------------------------|----------------------------|----------------------|---------------------------------------|------------------------------------------------------------------|
| <b>Macrohematuria without anemia</b>                                   | 4 (3.6%)                   | I                    | Within 6 hours after intervention     | Traction on bladder catheter and suspension of LMWH              |
| <b>Hypotension</b>                                                     | 1 (0.91%)                  | I                    | Within 24 hours after intervention    | Intravenous hydration therapy                                    |
| <b>Fever</b>                                                           | 1 (0.91%)                  | I                    | Within 24 hours after intervention    | Intravenous antibiotic therapy for 5 days after the intervention |
| <b>Infections</b>                                                      | 1 (0.91%)                  | I                    | Within 24 hours after intervention    | Intravenous antibiotic therapy for 5 days after the intervention |
| <b>Macrohematuria with anemia</b>                                      | 4 (3.6%)                   | II                   | Within 6 hours after intervention     | Transfusions                                                     |
| <b>Acute Urinary Retention</b>                                         | 7 (6.4%)                   | II                   | Within 6 hours after catheter removal | Catheterization                                                  |
| <b>Urethral Meatus Stenosis</b>                                        | 2 (1.8%)                   | II                   | Within 30 days after the operation    | Urethral meatus dilation                                         |
| <b>Macrohematuria with anemia not responding to blood transfusions</b> | 2 (1.8%)                   | III                  | Within 6 hours after intervention     | Endoscopic fulguration                                           |

*Supplementary Table 1 - post-operative complications ( $\leq 30$  POD) and relative management strategies.*
